# Supplementary material for: In Vitro Anticancer Effects of a Traditional Sri Lankan Polyherbal Decoction and Its Individual Components Against Colorectal Cancer Cells
Source: Research Square preprint supplement (doi:10.21203/rs.3.rs-7141234/v1), 2025-10-28
Supplement: Supplementary file 1 [file 886e655a4cba887086e8a1d7.docx]

**Supplementary file- Figures**


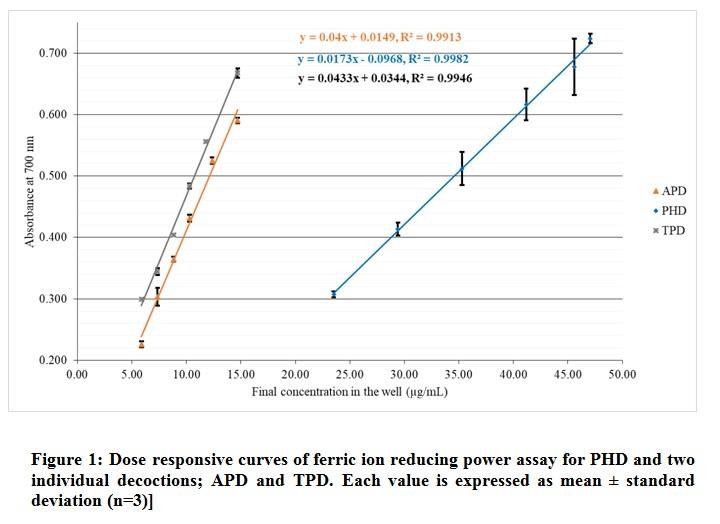


**Figure.1 Dose responsive curves of ferric ion reducing power assay for PHD and two individual decoctions; APD and TPD. Each value is expressed as mean ± standard deviation (n=3)]**

**
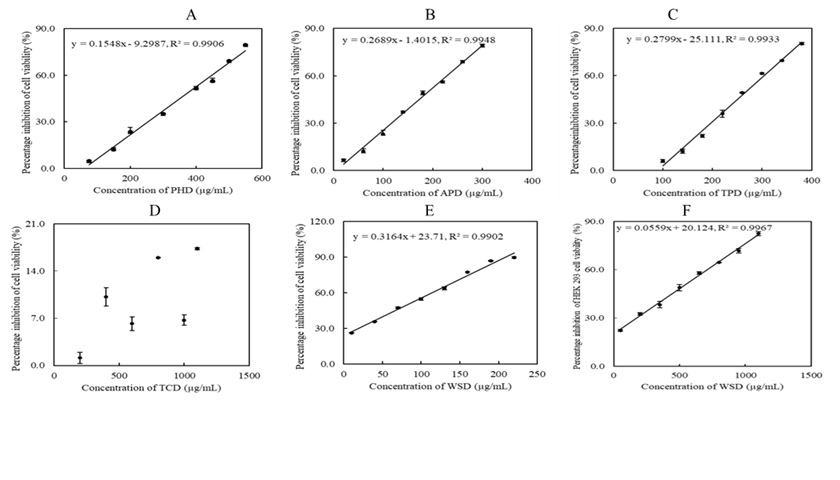
** **Figure 2. The cytotoxicity effects of polyherbal decoction and individual component decoctions. A) PHD, B) APD, C) TPD, D) TCD, E) WSD, F) WSD HEK293 cells.**

**
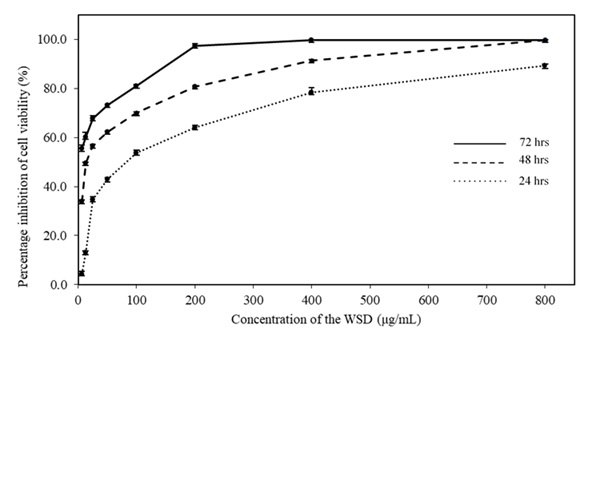
**

**Figure 3. Cytotoxicity effects of WSD at 24 h, 48 h and 72 h against HCT 116 cells.**

**
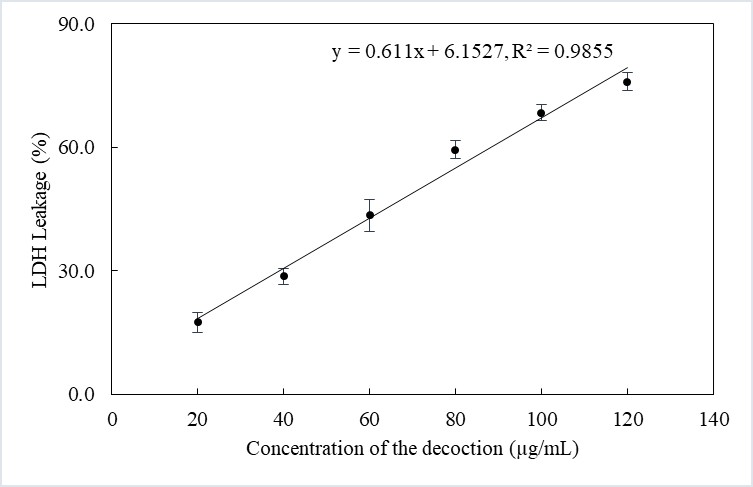
**

**Figure 4. Dose dependent curve of LDH leakage.**

**
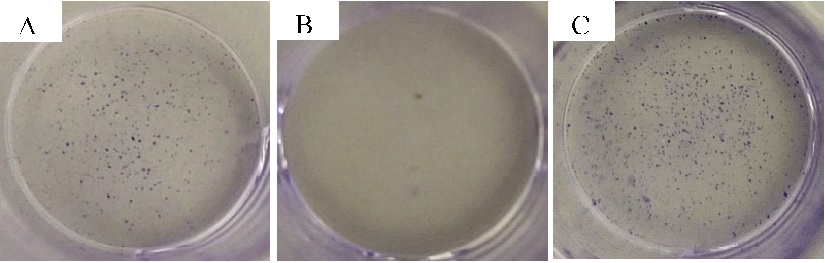
**

**Figure 5. Colony formation of HCT 116 cells upon treatment and after 7 days. A) WSD treated cells, B) Positive control, C) Negative control.**

**
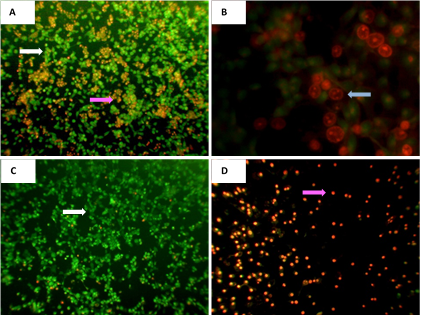
**

**Figure 6. A) Emits orange-red fluorescence upon Ethidium bromide intercalation with DNA in HCT 116 cells; indicating late apoptotic cells and dead cells, B) Fragmented nuclei C) Negative control (untreated cells) D) positive control.**


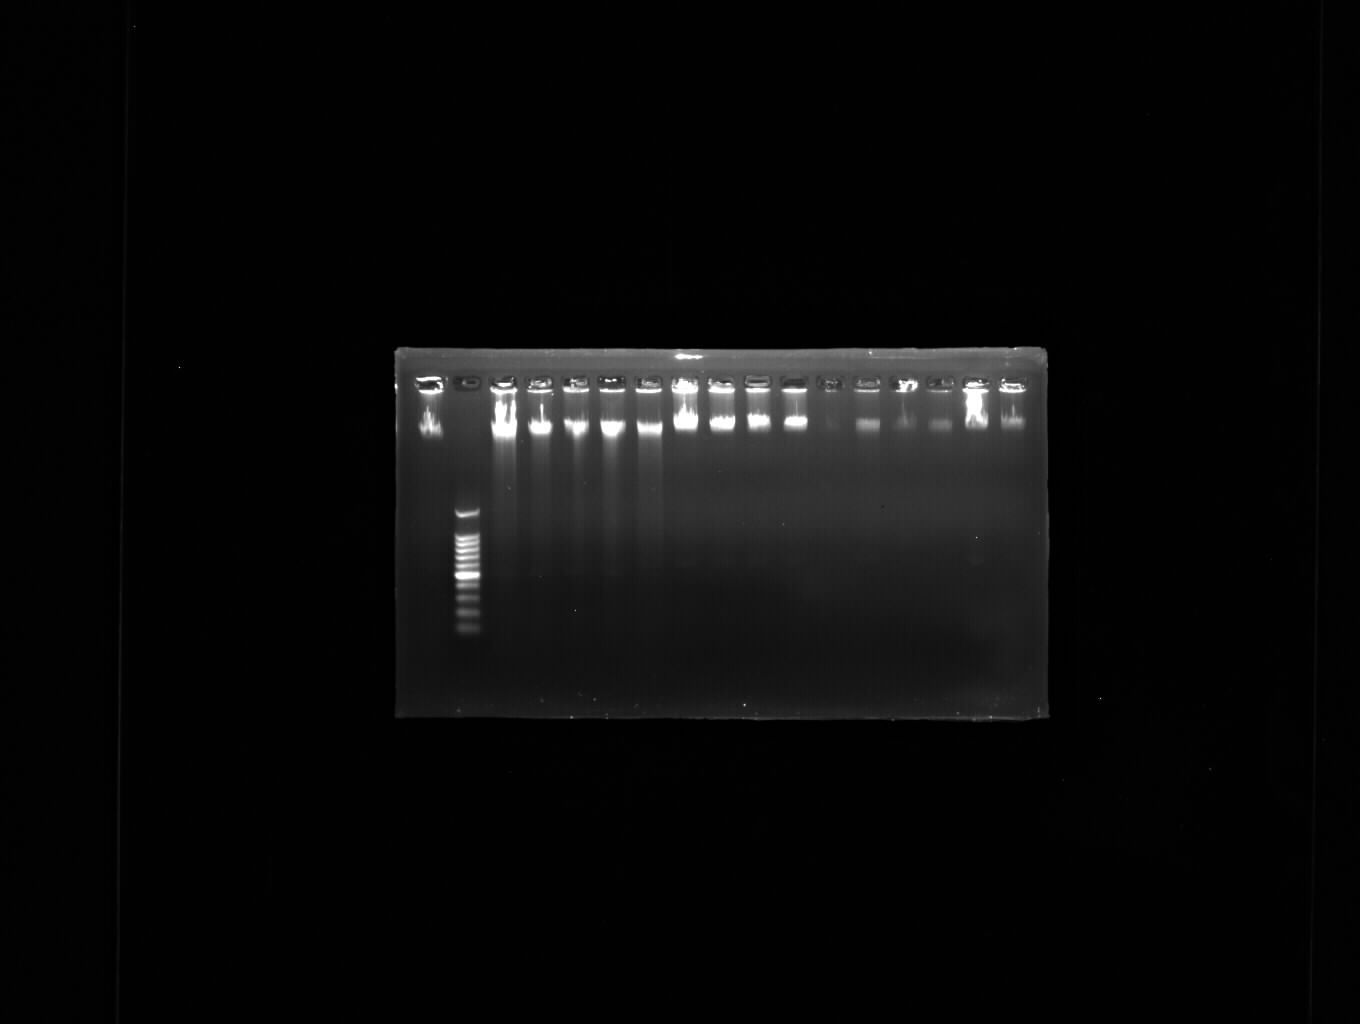


**1 2 3 4 5 6 7 8**

**Figure 7. Analysis of genomic DNA fragmentation. DNA fragmentation was assessed on 2% agarose gel electrophoresis and ethidium bromide staining. Lane 1: Negative control (1), Lane 2: 100bp ladder, Lane 3:Positive control (1), Lane 4: Positive control (2), Lane 5: WSD treated cells (24 hrs)-(1), Lane 6: WSD treated cells (24 hrs)-(2), Lane 7: WSD treated cells (24 hrs)-(3), Lane 8: Negative control (2)**


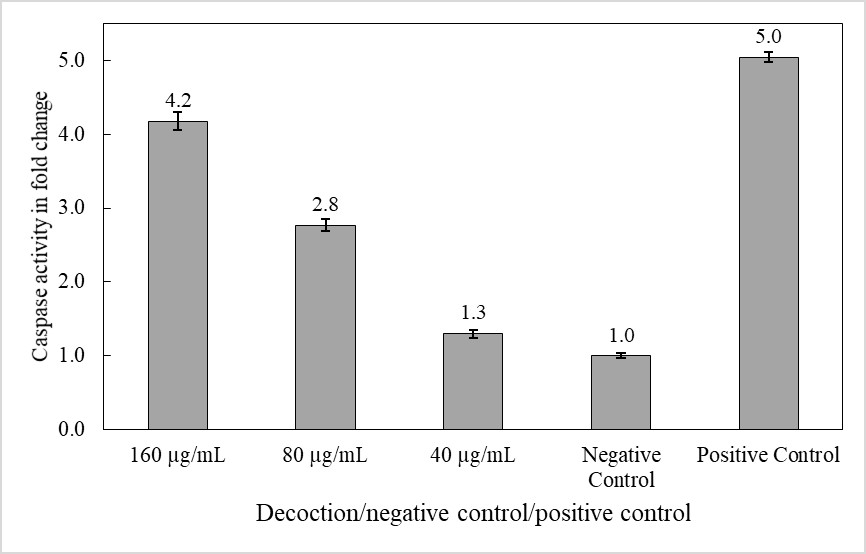


**Figure 8. Caspase activity of decoction, negative control and positive control.**

**
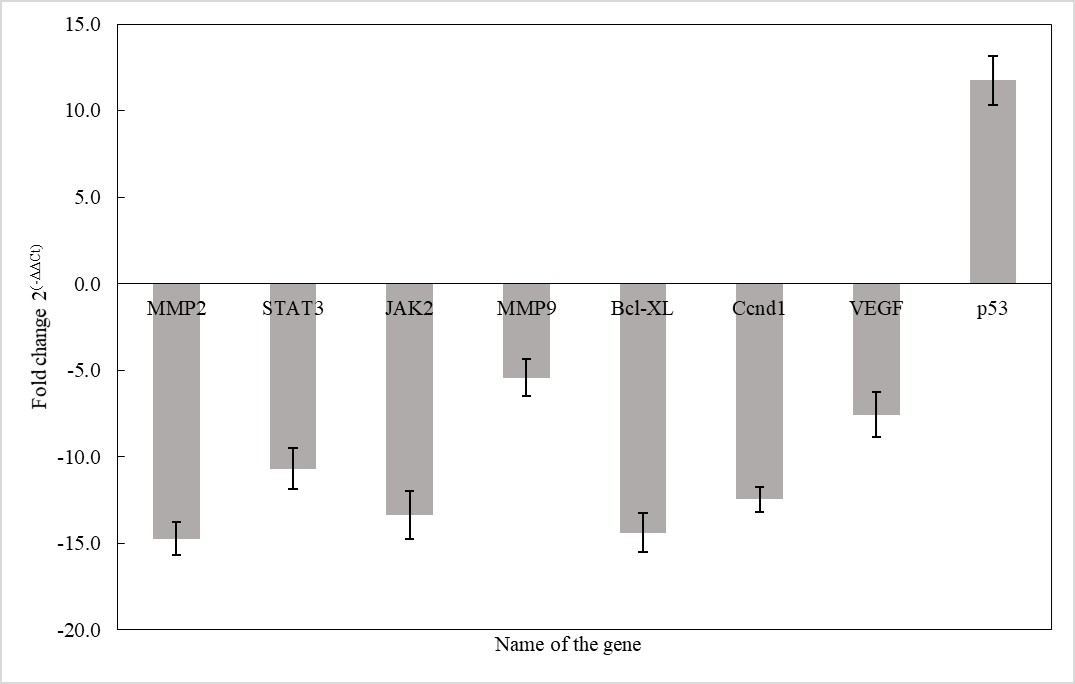
**

**Figure 9. Expression of fold change in MMP2, STAT3, JAK2, MMP9, Bcl-XL, Ccnd1, VEGF and p53.**
